# Supplementary material for: Biological Control Options for the Golden Twin-Spot Moth, Chrysodeixis chalcites (Esper) (Lepidoptera: Noctuidae) in Banana Crops of the Canary Islands
Source: MDPI journal article supplement (doi:10.3390/insects13060516), 2022-05-31
Supplement: s1 [file s1]

**Table S1.** Collection localities of *Chrysodeixis chalcites* parasitoid species in the Canary Islands.

| Island       | Locality              | Coordinates |             |
|--------------|-----------------------|-------------|-------------|
|              |                       | Long. (W)   | Lat. (N)    |
| Tenerife     | Caldera del Rey       | 16° 43' 15" | 28° 04' 31" |
|              | Cueva del Polvo       | 16° 49' 57" | 28° 13' 44" |
|              | Las Galletas          | 16° 39' 32" | 28° 01' 52" |
|              | Guía de Isora         | 16° 48' 34" | 28° 11' 22" |
|              | Hoya Meleque          | 16° 33' 31" | 28° 24' 22" |
|              | Pajalillos            | 16° 23' 13" | 28° 31' 42" |
|              | Valle de Guerra       | 16° 23' 07" | 28° 32' 26" |
| La Palma     | Breña Baja            | 17° 45' 31" | 28° 36' 44" |
|              | El Remo               | 17° 53' 17" | 28° 33' 21" |
|              | Fuencaliente          | 17° 51' 42" | 28° 28' 43" |
|              | Los Cancajos          | 17° 45' 37" | 28° 39' 28" |
|              | Los Llanos de Aridane | 17° 55' 53" | 28° 37' 27" |
| Gran Canaria | Puerto de Tazacorte   | 17° 56' 44" | 28° 39' 48" |
|              | Arguineguín           | 15° 40' 28" | 27° 45' 45" |
|              | Aruacas               | 15° 30' 54" | 28° 07' 58" |
|              | Gáldar                | 15° 39' 49" | 28° 09' 26" |
|              | Vecindario            | 15° 25' 44" | 28° 07' 52" |
| El Hierro    | Frontera              | 38° 00' 28" | 27° 46' 51" |
